# Supplementary material for: Pure rotational spectra of PbSe and PbTe: potential function, Born–Oppenheimer breakdown, field shift effect and magnetic shielding
Source: Royal Society of Chemistry journal article supplement (doi:10.1039/b716896a), 2008-01-01
Supplement: b716896a.pdf [file b716896a.pdf]

*Supplementary material for the article:*

**Pure rotational spectra of PbSe and PbTe: potential function,  
Born-Oppenheimer breakdown, field shift effect and magnetic shielding**

Barbara M. Giuliano, Luca Bizzocchi, Stephen Cooke, Deike Banser, Mareike Hess, Juliane Fritzsche, and Jens-Uwe Grabow.

**Content:**

- Table SI** Rotational transitions  $J' \leftarrow J$  of PbSe isotopologues. (A–B) are the mass number of the component atoms,  $v$  is the vibrational quantum number. Note: Line frequencies above 30 GHz are from Refs. [12,14].
- Table SII** Rotational transitions  $J' \leftarrow J$  of PbTe isotopologues. (A–B) are the mass number of the component atoms,  $v$  is the vibrational quantum number. Note: Line frequencies above 30 GHz are from Refs. [12,14].
- Table SIII** Dunham constants, spectroscopic parameters, mass-independent  $U_{lm}$  constants, and BOB-correction terms for 16 isotopologues of PbSe obtained using method A (see text).
- Table SIV** Dunham constants, spectroscopic parameters, mass-independent  $U_{lm}$  constants, and BOB-correction terms for 26 isotopologues of PbTe obtained using method A (see text).

TABLE SI: Rotational transitions  $J' \leftarrow J$  of PbSe isotopologues. (A–B) are the mass number of the component atoms,  $v$  is the vibrational quantum number. Note: Line frequencies above 30 GHz are from Refs. [12,14].

| Line no. | (A–B)  | $v$ | $J$ | Frequency (MHz) |
|----------|--------|-----|-----|-----------------|
| 1        | 208–80 | 0   | 1   | 6059.94768      |
| 2        | 208–80 | 0   | 2   | 9089.90978      |
| 3        | 208–80 | 0   | 3   | 12119.85692     |
| 4        | 208–80 | 0   | 4   | 15149.78509     |
| 5        | 208–80 | 0   | 5   | 18179.68895     |
| 6        | 208–80 | 0   | 6   | 21209.56417     |
| 7        | 208–80 | 0   | 23  | 72708.35700     |
| 8        | 208–80 | 0   | 34  | 106014.78300    |
| 9        | 208–80 | 0   | 35  | 109041.72900    |
| 10       | 208–80 | 1   | 1   | 6044.34574      |
| 11       | 208–80 | 1   | 2   | 9066.50662      |
| 12       | 208–80 | 1   | 3   | 12088.65283     |
| 13       | 208–80 | 1   | 4   | 15110.77990     |
| 14       | 208–80 | 1   | 5   | 18132.88267     |
| 15       | 208–80 | 1   | 6   | 21154.95661     |
| 16       | 208–80 | 1   | 23  | 72521.10900     |
| 17       | 208–80 | 1   | 34  | 105741.66700    |
| 18       | 208–80 | 1   | 35  | 108760.81400    |
| 19       | 208–80 | 2   | 1   | 6028.71575      |
| 20       | 208–80 | 2   | 2   | 9043.06159      |
| 21       | 208–80 | 2   | 3   | 12057.39279     |
| 22       | 208–80 | 2   | 4   | 15071.70471     |
| 23       | 208–80 | 2   | 5   | 18085.99241     |
| 24       | 208–80 | 2   | 6   | 21100.25103     |
| 25       | 208–80 | 2   | 23  | 72333.52600     |
| 26       | 208–80 | 2   | 34  | 105468.08400    |
| 27       | 208–80 | 2   | 35  | 108479.38800    |
| 28       | 208–80 | 3   | 1   | 6013.05707      |
| 29       | 208–80 | 3   | 2   | 9019.57354      |
| 30       | 208–80 | 3   | 3   | 12026.07576     |
| 31       | 208–80 | 3   | 4   | 15032.55887     |

*continued on the next page*

TABLE SI: *continued*

| Line no. | (A–B)  | $v$ | $J$ | Frequency (MHz) |
|----------|--------|-----|-----|-----------------|
| 32       | 208–80 | 3   | 5   | 18039.01680     |
| 33       | 208–80 | 3   | 6   | 21045.44606     |
| 34       | 208–80 | 3   | 23  | 72145.60600     |
| 35       | 208–80 | 3   | 34  | 105193.98900    |
| 36       | 208–80 | 3   | 35  | 108197.46800    |
| 37       | 208–80 | 4   | 1   | 5997.37008      |
| 38       | 208–80 | 4   | 2   | 8996.04305      |
| 39       | 208–80 | 4   | 3   | 11994.70073     |
| 40       | 208–80 | 4   | 4   | 14993.34050     |
| 41       | 208–80 | 4   | 5   | 17991.95396     |
| 42       | 208–80 | 4   | 6   | 20990.53921     |
| 43       | 208–80 | 4   | 23  | 71957.32100     |
| 44       | 208–80 | 4   | 34  | 104919.38500    |
| 45       | 208–80 | 4   | 35  | 107915.00700    |
| 46       | 208–80 | 5   | 3   | 11963.26652     |
| 47       | 208–80 | 5   | 4   | 14954.04764     |
| 48       | 208–80 | 5   | 5   | 17944.80276     |
| 49       | 208–80 | 5   | 23  | 71768.70800     |
| 50       | 208–80 | 5   | 34  | 104644.26800    |
| 51       | 208–80 | 5   | 35  | 107632.04000    |
| 52       | 208–80 | 6   | 3   | 11931.77277     |
| 53       | 208–80 | 6   | 4   | 14914.68012     |
| 54       | 208–80 | 6   | 5   | 17897.56075     |
| 55       | 208–80 | 6   | 23  | 71579.72300     |
| 56       | 208–80 | 6   | 34  | 104368.62300    |
| 57       | 208–80 | 6   | 35  | 107348.50300    |
| 58       | 208–80 | 7   | 3   | 11900.21676     |
| 59       | 208–80 | 7   | 23  | 71390.36900     |
| 60       | 208–80 | 7   | 34  | 104092.46700    |
| 61       | 208–80 | 7   | 35  | 107064.44400    |
| 62       | 208–80 | 8   | 3   | 11868.60012     |
| 63       | 208–80 | 8   | 23  | 71200.63300     |
| 64       | 208–80 | 8   | 35  | 106779.79000    |
| 65       | 208–80 | 9   | 3   | 11836.92005     |

*continued on the next page*

TABLE SI: *continued*

| Line no. | (A–B)  | $v$ | $J$ | Frequency (MHz) |
|----------|--------|-----|-----|-----------------|
| 66       | 208–80 | 9   | 35  | 106494.58900    |
| 67       | 208–80 | 10  | 3   | 11805.17487     |
| 68       | 208–80 | 10  | 35  | 106208.79200    |
| 69       | 208–80 | 11  | 3   | 11773.36601     |
| 70       | 208–80 | 11  | 35  | 105922.43200    |
| 71       | 208–80 | 12  | 3   | 11741.49138     |
| 72       | 208–80 | 13  | 3   | 11709.54665     |
| 73       | 208–78 | 0   | 1   | 6172.19737      |
| 74       | 208–78 | 0   | 2   | 9258.28375      |
| 75       | 208–78 | 0   | 3   | 12344.35505     |
| 76       | 208–78 | 0   | 4   | 15430.40639     |
| 77       | 208–78 | 0   | 5   | 18516.43271     |
| 78       | 208–78 | 0   | 6   | 21602.42899     |
| 79       | 208–78 | 0   | 34  | 107977.85900    |
| 80       | 208–78 | 1   | 1   | 6156.15935      |
| 81       | 208–78 | 1   | 2   | 9234.22652      |
| 82       | 208–78 | 1   | 3   | 12312.27878     |
| 83       | 208–78 | 1   | 4   | 15390.31104     |
| 84       | 208–78 | 1   | 5   | 18468.31789     |
| 85       | 208–78 | 1   | 6   | 21546.29521     |
| 86       | 208–78 | 1   | 34  | 107697.13300    |
| 87       | 208–78 | 2   | 1   | 6140.09166      |
| 88       | 208–78 | 2   | 2   | 9210.12606      |
| 89       | 208–78 | 2   | 3   | 12280.14341     |
| 90       | 208–78 | 2   | 4   | 15350.14287     |
| 91       | 208–78 | 2   | 5   | 18420.11640     |
| 92       | 208–78 | 2   | 6   | 21490.05963     |
| 93       | 208–78 | 2   | 34  | 107415.87600    |
| 94       | 208–78 | 4   | 34  | 106851.86000    |
| 95       | 206–80 | 0   | 1   | 6076.28697      |
| 96       | 206–80 | 0   | 2   | 9114.41843      |
| 97       | 206–80 | 0   | 3   | 12152.53502     |
| 98       | 206–80 | 0   | 4   | 15190.63333     |
| 99       | 206–80 | 0   | 5   | 18228.70572     |

*continued on the next page*

TABLE SI: *continued*

| Line no. | (A–B)  | $v$ | $J$ | Frequency (MHz) |
|----------|--------|-----|-----|-----------------|
| 100      | 206–80 | 0   | 6   | 21266.75004     |
| 101      | 206–80 | 0   | 34  | 106300.53700    |
| 102      | 206–80 | 1   | 1   | 6060.62153      |
| 103      | 206–80 | 1   | 2   | 9090.92107      |
| 104      | 206–80 | 1   | 3   | 12121.20444     |
| 105      | 206–80 | 1   | 4   | 15151.46989     |
| 106      | 206–80 | 1   | 5   | 18181.70983     |
| 107      | 206–80 | 1   | 6   | 21211.92078     |
| 108      | 206–80 | 1   | 34  | 106026.31900    |
| 109      | 206–80 | 2   | 1   | 6044.92918      |
| 110      | 206–80 | 2   | 2   | 9067.38108      |
| 111      | 206–80 | 2   | 3   | 12089.81676     |
| 112      | 206–80 | 2   | 4   | 15112.23706     |
| 113      | 206–80 | 2   | 5   | 18134.62962     |
| 114      | 206–80 | 2   | 6   | 21156.99445     |
| 115      | 206–80 | 3   | 34  | 105476.44600    |
| 116      | 206–80 | 4   | 34  | 105200.69500    |
| 117      | 206–80 | 5   | 34  | 104924.45300    |
| 118      | 207–80 | 0   | 1   | 6068.07469      |
| 119      | 207–80 | 0   | 2   | 9102.10022      |
| 120      | 207–80 | 0   | 3   | 12136.11099     |
| 121      | 207–80 | 0   | 4   | 15170.10356     |
| 122      | 207–80 | 0   | 5   | 18204.06993     |
| 123      | 207–80 | 0   | 6   | 21238.00841     |
| 124      | 207–80 | 0   | 35  | 109187.90600    |
| 125      | 207–80 | 1   | 1   | 6052.44151      |
| 126      | 207–80 | 1   | 2   | 9078.65015      |
| 127      | 207–80 | 1   | 3   | 12104.84394     |
| 128      | 207–80 | 1   | 4   | 15131.01971     |
| 129      | 207–80 | 1   | 5   | 18157.16894     |
| 130      | 207–80 | 1   | 6   | 21183.29116     |
| 131      | 207–80 | 1   | 35  | 108906.43500    |
| 132      | 207–80 | 3   | 35  | 108341.99600    |
| 133      | 207–80 | 4   | 35  | 108058.92900    |

*continued on the next page*

TABLE SI: *continued*

| Line no. | (A–B)  | $v$ | $J$ | Frequency (MHz) |
|----------|--------|-----|-----|-----------------|
| 134      | 207–80 | 5   | 35  | 107775.37900    |
| 135      | 206–78 | 0   | 1   | 6188.53639      |
| 136      | 206–78 | 0   | 2   | 9282.79154      |
| 137      | 206–78 | 0   | 3   | 12377.03174     |
| 138      | 206–78 | 0   | 4   | 15471.25325     |
| 139      | 206–78 | 0   | 5   | 18565.44874     |
| 140      | 206–78 | 0   | 6   | 21659.61368     |
| 141      | 206–78 | 0   | 34  | 108263.61000    |
| 142      | 206–78 | 1   | 34  | 107981.75300    |
| 143      | 206–78 | 2   | 34  | 107699.39000    |
| 144      | 206–78 | 3   | 34  | 107416.50800    |
| 145      | 207–78 | 0   | 1   | 6180.32382      |
| 146      | 207–78 | 0   | 2   | 9270.47330      |
| 147      | 207–78 | 0   | 3   | 12360.60830     |
| 148      | 207–78 | 0   | 4   | 15450.72372     |
| 149      | 207–78 | 0   | 5   | 18540.81374     |
| 150      | 207–78 | 0   | 6   | 21630.87277     |
| 151      | 207–78 | 0   | 33  | 105032.81000    |
| 152      | 207–78 | 0   | 34  | 108119.99500    |
| 153      | 207–78 | 1   | 33  | 104759.56100    |
| 154      | 207–78 | 1   | 34  | 107838.70200    |
| 155      | 207–78 | 2   | 33  | 104485.80700    |
| 156      | 207–78 | 2   | 34  | 107556.90000    |
| 157      | 207–78 | 3   | 33  | 104211.56000    |
| 158      | 207–78 | 3   | 34  | 107274.57100    |
| 159      | 207–78 | 4   | 33  | 103936.78900    |
| 160      | 207–78 | 4   | 34  | 106991.71900    |
| 161      | 208–82 | 0   | 1   | 5953.12562      |
| 162      | 208–82 | 0   | 2   | 8929.67543      |
| 163      | 208–82 | 0   | 3   | 11906.21280     |
| 164      | 208–82 | 0   | 4   | 14882.73083     |
| 165      | 208–82 | 0   | 5   | 17859.22536     |
| 166      | 208–82 | 0   | 6   | 20835.69263     |
| 167      | 208–82 | 0   | 35  | 107120.22000    |

*continued on the next page*

TABLE SI: *continued*

| Line no. | (A–B)  | $v$ | $J$ | Frequency (MHz) |
|----------|--------|-----|-----|-----------------|
| 168      | 208–82 | 1   | 35  | 106846.70700    |
| 169      | 208–82 | 2   | 35  | 106572.73100    |
| 170      | 208–82 | 3   | 35  | 106298.23000    |
| 171      | 208–76 | 0   | 1   | 6290.28911      |
| 172      | 208–76 | 0   | 2   | 9435.42097      |
| 173      | 208–76 | 0   | 3   | 12580.53573     |
| 174      | 208–76 | 0   | 4   | 15725.63220     |
| 175      | 208–76 | 0   | 5   | 18870.70191     |
| 176      | 208–76 | 0   | 6   | 22015.73970     |
| 177      | 208–76 | 0   | 33  | 106901.02300    |
| 178      | 208–76 | 1   | 33  | 106620.45000    |
| 179      | 208–76 | 2   | 33  | 106339.36300    |
| 180      | 208–76 | 3   | 33  | 106057.72400    |
| 181      | 208–76 | 4   | 33  | 105775.59100    |
| 182      | 208–77 | 0   | 1   | 6230.37916      |
| 183      | 208–77 | 0   | 2   | 9345.55569      |
| 184      | 208–77 | 0   | 3   | 12460.71728     |
| 185      | 208–77 | 0   | 4   | 15575.85835     |
| 186      | 208–77 | 0   | 5   | 18690.97422     |
| 187      | 208–77 | 0   | 6   | 21806.05918     |
| 188      | 206–82 | 0   | 1   | 5969.46429      |
| 189      | 206–82 | 0   | 2   | 8954.18581      |
| 190      | 206–82 | 0   | 3   | 11938.89155     |
| 191      | 206–82 | 0   | 4   | 14923.57905     |
| 192      | 206–82 | 0   | 5   | 17908.24315     |
| 193      | 206–82 | 0   | 6   | 20892.87962     |
| 194      | 206–82 | 0   | 35  | 107414.12700    |
| 195      | 206–82 | 1   | 35  | 107139.49600    |
| 196      | 206–82 | 2   | 35  | 106864.38600    |
| 197      | 207–82 | 0   | 1   | 5961.25231      |
| 198      | 207–82 | 0   | 2   | 8941.86736      |
| 199      | 207–82 | 0   | 3   | 11922.46683     |
| 200      | 207–82 | 0   | 4   | 14903.04867     |
| 201      | 207–82 | 0   | 5   | 17883.60677     |

*continued on the next page*

TABLE SI: *continued*

| Line no. | (A–B)  | $v$ | $J$ | Frequency (MHz) |
|----------|--------|-----|-----|-----------------|
| 202      | 207–82 | 0   | 6   | 20864.13737     |
| 203      | 206–76 | 0   | 1   | 6306.62672      |
| 204      | 206–76 | 0   | 2   | 9459.92743      |
| 205      | 206–76 | 0   | 3   | 12613.21225     |
| 206      | 206–76 | 0   | 4   | 15766.47806     |
| 207      | 206–76 | 0   | 5   | 18919.71643     |
| 208      | 206–76 | 0   | 6   | 22072.92354     |
| 209      | 206–76 | 0   | 33  | 107178.62100    |
| 210      | 206–76 | 1   | 33  | 106896.93700    |
| 211      | 206–76 | 2   | 33  | 106614.75300    |
| 212      | 207–76 | 0   | 1   | 6298.41457      |
| 213      | 207–76 | 0   | 2   | 9447.60954      |
| 214      | 207–76 | 0   | 3   | 12596.78994     |
| 215      | 207–76 | 0   | 4   | 15745.94886     |
| 216      | 207–76 | 0   | 5   | 18895.08132     |
| 217      | 207–76 | 0   | 6   | 22044.18246     |
| 218      | 207–77 | 0   | 1   | 6238.50582      |
| 219      | 207–77 | 0   | 2   | 9357.74599      |
| 220      | 207–77 | 0   | 3   | 12476.97087     |
| 221      | 207–77 | 0   | 4   | 15596.17535     |
| 222      | 207–77 | 0   | 5   | 18715.35435     |
| 223      | 207–77 | 0   | 6   | 21834.50276     |
| 224      | 206–77 | 0   | 1   | 6246.71727      |
| 225      | 206–77 | 0   | 2   | 9370.06369      |
| 226      | 206–77 | 0   | 3   | 12493.39447     |
| 227      | 206–77 | 0   | 4   | 15616.70455     |
| 228      | 206–77 | 0   | 5   | 18739.98925     |
| 229      | 206–77 | 0   | 6   | 21863.24283     |
| 230      | 204–80 | 0   | 34  | 106591.77100    |
| 231      | 204–80 | 0   | 35  | 109635.19200    |
| 232      | 204–80 | 1   | 35  | 109351.97500    |



TABLE SII: Rotational transitions  $J' \leftarrow J$  of PbTe isotopologues. (A–B) are the mass number of the component atoms,  $v$  is the vibrational quantum number. Note: Line frequencies above 30 GHz are from Refs. [12,14].

| Line no. | (A–B)   | $v$ | $J$ | Frequency (MHz) |
|----------|---------|-----|-----|-----------------|
| 1        | 208–130 | 0   | 1   | 3750.27988      |
| 2        | 208–130 | 0   | 2   | 5625.41511      |
| 3        | 208–130 | 0   | 3   | 7500.54504      |
| 4        | 208–130 | 0   | 4   | 9375.66647      |
| 5        | 208–130 | 0   | 5   | 11250.77755     |
| 6        | 208–130 | 0   | 6   | 13125.87843     |
| 7        | 208–130 | 0   | 7   | 15000.96493     |
| 8        | 208–130 | 0   | 8   | 16876.03570     |
| 9        | 208–130 | 0   | 9   | 18751.08875     |
| 10       | 208–130 | 0   | 10  | 20626.12216     |
| 11       | 208–130 | 0   | 11  | 22501.13412     |
| 12       | 208–130 | 0   | 12  | 24376.12224     |
| 13       | 208–130 | 0   | 13  | 26251.08582     |
| 14       | 208–130 | 0   | 22  | 43124.28500     |
| 15       | 208–130 | 0   | 37  | 71237.46400     |
| 16       | 208–130 | 0   | 46  | 88097.77500     |
| 17       | 208–130 | 0   | 47  | 89970.68300     |
| 18       | 208–130 | 0   | 48  | 91843.52300     |
| 19       | 208–130 | 0   | 49  | 93716.27100     |
| 20       | 208–130 | 0   | 57  | 108694.51200    |
| 21       | 208–130 | 1   | 3   | 7484.34905      |
| 22       | 208–130 | 1   | 5   | 11226.48236     |
| 23       | 208–130 | 1   | 6   | 13097.53319     |
| 24       | 208–130 | 1   | 7   | 14968.57264     |
| 25       | 208–130 | 1   | 8   | 16839.59321     |
| 26       | 208–130 | 1   | 9   | 18710.59573     |
| 27       | 208–130 | 1   | 10  | 20581.58116     |
| 28       | 208–130 | 1   | 11  | 22452.54292     |
| 29       | 208–130 | 1   | 12  | 24323.48324     |
| 30       | 208–130 | 1   | 37  | 71083.56200     |
| 31       | 208–130 | 1   | 46  | 87907.37800     |

*continued on the next page*

TABLE SII: *continued*

| Line no. | (A–B)   | $v$ | $J$ | Frequency (MHz) |
|----------|---------|-----|-----|-----------------|
| 32       | 208–130 | 1   | 47  | 89776.27000     |
| 33       | 208–130 | 1   | 48  | 91645.04300     |
| 34       | 208–130 | 1   | 49  | 93513.73900     |
| 35       | 208–130 | 1   | 57  | 108459.53100    |
| 36       | 208–130 | 2   | 4   | 9335.13889      |
| 37       | 208–130 | 2   | 5   | 11202.14494     |
| 38       | 208–130 | 2   | 6   | 13069.13950     |
| 39       | 208–130 | 2   | 7   | 14936.11939     |
| 40       | 208–130 | 2   | 8   | 16803.08487     |
| 41       | 208–130 | 2   | 37  | 70929.39100     |
| 42       | 208–130 | 2   | 46  | 87716.67800     |
| 43       | 208–130 | 2   | 47  | 89581.48400     |
| 44       | 208–130 | 2   | 48  | 91446.20400     |
| 45       | 208–130 | 2   | 49  | 93310.82700     |
| 46       | 208–130 | 2   | 57  | 108224.13600    |
| 47       | 208–130 | 3   | 4   | 9314.81854      |
| 48       | 208–130 | 3   | 5   | 11177.76220     |
| 49       | 208–130 | 3   | 8   | 16766.50890     |
| 50       | 208–130 | 3   | 37  | 70774.92600     |
| 51       | 208–130 | 3   | 46  | 87525.60500     |
| 52       | 208–130 | 3   | 47  | 89386.35100     |
| 53       | 208–130 | 3   | 48  | 91247.01600     |
| 54       | 208–130 | 3   | 49  | 93107.58100     |
| 55       | 208–130 | 3   | 57  | 107988.30800    |
| 56       | 208–130 | 4   | 5   | 11153.33333     |
| 57       | 208–130 | 4   | 37  | 70620.17800     |
| 58       | 208–130 | 4   | 46  | 87334.13900     |
| 59       | 208–130 | 4   | 47  | 89190.83600     |
| 60       | 208–130 | 4   | 48  | 91047.41100     |
| 61       | 208–130 | 4   | 49  | 92903.89700     |
| 62       | 208–130 | 4   | 57  | 107752.03100    |
| 63       | 208–130 | 5   | 5   | 11128.85819     |
| 64       | 208–130 | 5   | 46  | 87142.39100     |
| 65       | 208–130 | 5   | 37  | 70465.13300     |

*continued on the next page*

TABLE SII: *continued*

| Line no. | (A–B)   | $v$ | $J$ | Frequency (MHz) |
|----------|---------|-----|-----|-----------------|
| 66       | 208–130 | 5   | 47  | 88994.99000     |
| 67       | 208–130 | 5   | 48  | 90847.48600     |
| 68       | 208–130 | 5   | 49  | 92699.86900     |
| 69       | 208–130 | 5   | 57  | 107515.32600    |
| 70       | 208–130 | 6   | 5   | 11104.33931     |
| 71       | 208–130 | 6   | 37  | 70309.81400     |
| 72       | 208–130 | 6   | 46  | 86950.23800     |
| 73       | 208–130 | 6   | 47  | 88798.73100     |
| 74       | 208–130 | 6   | 48  | 90647.16300     |
| 75       | 208–130 | 6   | 49  | 92495.47200     |
| 76       | 208–130 | 6   | 57  | 107278.17600    |
| 77       | 208–130 | 7   | 5   | 11079.77051     |
| 78       | 208–130 | 7   | 46  | 86757.73300     |
| 79       | 208–130 | 7   | 48  | 90446.44900     |
| 80       | 208–130 | 7   | 47  | 88602.15800     |
| 81       | 208–130 | 7   | 57  | 107040.56000    |
| 82       | 208–130 | 8   | 5   | 11055.15814     |
| 83       | 208–130 | 8   | 47  | 88405.16200     |
| 84       | 208–130 | 8   | 48  | 90245.34100     |
| 85       | 208–130 | 8   | 57  | 106802.46000    |
| 86       | 208–130 | 9   | 5   | 11030.49660     |
| 87       | 208–130 | 9   | 48  | 90043.83300     |
| 88       | 208–130 | 9   | 57  | 106563.93800    |
| 89       | 208–130 | 10  | 5   | 11005.78376     |
| 90       | 208–130 | 10  | 48  | 89841.99100     |
| 91       | 208–130 | 10  | 57  | 106324.90200    |
| 92       | 208–130 | 11  | 5   | 10981.02170     |
| 93       | 208–130 | 11  | 57  | 106085.37600    |
| 94       | 208–130 | 12  | 5   | 10956.21025     |
| 95       | 208–130 | 12  | 57  | 105845.40400    |
| 96       | 208–130 | 13  | 5   | 10931.35009     |
| 97       | 208–128 | 0   | 1   | 3786.38741      |
| 98       | 208–128 | 0   | 2   | 5679.57695      |
| 99       | 208–128 | 0   | 3   | 7572.75962      |

*continued on the next page*

TABLE SII: *continued*

| Line no. | (A–B)   | $v$ | $J$ | Frequency (MHz) |
|----------|---------|-----|-----|-----------------|
| 100      | 208–128 | 0   | 4   | 9465.93496      |
| 101      | 208–128 | 0   | 5   | 11359.09960     |
| 102      | 208–128 | 0   | 6   | 13252.25260     |
| 103      | 208–128 | 0   | 7   | 15145.39227     |
| 104      | 208–128 | 0   | 8   | 17038.51421     |
| 105      | 208–128 | 0   | 9   | 18931.61940     |
| 106      | 208–128 | 0   | 10  | 20824.70443     |
| 107      | 208–128 | 0   | 11  | 22717.76734     |
| 108      | 208–128 | 0   | 12  | 24610.80762     |
| 109      | 208–128 | 0   | 13  | 26503.81990     |
| 110      | 208–128 | 0   | 37  | 71923.16600     |
| 111      | 208–128 | 0   | 46  | 88945.63900     |
| 112      | 208–128 | 0   | 47  | 90836.57900     |
| 113      | 208–128 | 0   | 48  | 92727.41800     |
| 114      | 208–128 | 0   | 49  | 94618.16400     |
| 115      | 208–128 | 0   | 56  | 107850.50100    |
| 116      | 208–128 | 1   | 3   | 7556.32843      |
| 117      | 208–128 | 1   | 4   | 9445.39507      |
| 118      | 208–128 | 1   | 5   | 11334.45299     |
| 119      | 208–128 | 1   | 6   | 13223.49859     |
| 120      | 208–128 | 1   | 7   | 15112.52889     |
| 121      | 208–128 | 1   | 8   | 17001.54337     |
| 122      | 208–128 | 1   | 9   | 18890.54028     |
| 123      | 208–128 | 1   | 10  | 20779.51967     |
| 124      | 208–128 | 1   | 11  | 22668.47324     |
| 125      | 208–128 | 1   | 12  | 24557.40297     |
| 126      | 208–128 | 1   | 37  | 71767.03500     |
| 127      | 208–128 | 1   | 46  | 88752.50000     |
| 128      | 208–128 | 1   | 47  | 90639.33200     |
| 129      | 208–128 | 1   | 48  | 92526.05500     |
| 130      | 208–128 | 1   | 49  | 94412.70600     |
| 131      | 208–128 | 1   | 56  | 107616.23800    |
| 132      | 208–128 | 2   | 4   | 9424.81868      |
| 133      | 208–128 | 2   | 5   | 11309.76046     |

*continued on the next page*

TABLE SII: *continued*

| Line no. | (A–B)   | $\nu$ | $J$ | Frequency (MHz) |
|----------|---------|-------|-----|-----------------|
| 134      | 208–128 | 2     | 6   | 13194.69134     |
| 135      | 208–128 | 2     | 7   | 15079.60598     |
| 136      | 208–128 | 2     | 8   | 16964.50592     |
| 137      | 208–128 | 2     | 37  | 71610.61600     |
| 138      | 208–128 | 2     | 46  | 88559.05200     |
| 139      | 208–128 | 2     | 47  | 90441.70500     |
| 140      | 208–128 | 2     | 48  | 92324.33900     |
| 141      | 208–128 | 2     | 49  | 94206.85800     |
| 142      | 208–128 | 2     | 56  | 107381.54900    |
| 143      | 208–128 | 3     | 4   | 9404.20529      |
| 144      | 208–128 | 3     | 5   | 11285.02300     |
| 145      | 208–128 | 3     | 7   | 15046.62303     |
| 146      | 208–128 | 3     | 8   | 16927.39965     |
| 147      | 208–128 | 3     | 37  | 71453.90900     |
| 148      | 208–128 | 3     | 46  | 88365.18500     |
| 149      | 208–128 | 3     | 47  | 90243.75700     |
| 150      | 208–128 | 3     | 48  | 92122.24100     |
| 151      | 208–128 | 3     | 49  | 94000.62600     |
| 152      | 208–128 | 3     | 56  | 107146.41600    |
| 153      | 208–128 | 4     | 46  | 88170.98000     |
| 154      | 208–128 | 4     | 47  | 90045.40400     |
| 155      | 208–128 | 4     | 48  | 91919.77200     |
| 156      | 208–128 | 4     | 49  | 93794.00800     |
| 157      | 208–128 | 4     | 56  | 106910.85300    |
| 158      | 208–128 | 5     | 46  | 87976.38500     |
| 159      | 208–128 | 5     | 47  | 89846.71100     |
| 160      | 208–128 | 5     | 48  | 91716.91900     |
| 161      | 208–128 | 5     | 49  | 93586.99700     |
| 162      | 208–128 | 6     | 46  | 87781.45400     |
| 163      | 208–128 | 6     | 47  | 89647.60800     |
| 164      | 208–128 | 6     | 48  | 91513.66200     |
| 165      | 208–128 | 6     | 49  | 93379.62100     |
| 166      | 208–128 | 7     | 46  | 87586.15900     |
| 167      | 208–128 | 7     | 47  | 89448.15300     |

*continued on the next page*

TABLE SII: *continued*

| Line no. | (A–B)   | $\nu$ | $J$ | Frequency (MHz) |
|----------|---------|-------|-----|-----------------|
| 168      | 208–128 | 7     | 49  | 93171.89600     |
| 169      | 208–128 | 8     | 46  | 87390.46300     |
| 170      | 208–128 | 8     | 47  | 89248.30600     |
| 171      | 208–128 | 8     | 48  | 91106.04200     |
| 172      | 208–128 | 8     | 49  | 92963.66400     |
| 173      | 208–128 | 9     | 49  | 92755.07600     |
| 174      | 208–128 | 9     | 47  | 89048.01700     |
| 175      | 208–126 | 0     | 1   | 3823.63183      |
| 176      | 208–126 | 0     | 2   | 5735.44238      |
| 177      | 208–126 | 0     | 3   | 7647.24677      |
| 178      | 208–126 | 0     | 4   | 9559.04300      |
| 179      | 208–126 | 0     | 5   | 11470.82967     |
| 180      | 208–126 | 0     | 6   | 13382.60377     |
| 181      | 208–126 | 0     | 7   | 15294.36354     |
| 182      | 208–126 | 0     | 8   | 17206.10788     |
| 183      | 208–126 | 0     | 9   | 19117.83185     |
| 184      | 208–126 | 0     | 10  | 21029.53782     |
| 185      | 208–126 | 0     | 11  | 22941.21935     |
| 186      | 208–126 | 0     | 12  | 24852.87738     |
| 187      | 208–126 | 0     | 37  | 72630.43100     |
| 188      | 208–126 | 0     | 46  | 89820.17300     |
| 189      | 208–126 | 0     | 47  | 91729.69300     |
| 190      | 208–126 | 0     | 55  | 107002.15500    |
| 191      | 208–126 | 0     | 57  | 110819.18400    |
| 192      | 208–126 | 1     | 3   | 7630.57121      |
| 193      | 208–126 | 1     | 4   | 9538.19982      |
| 194      | 208–126 | 1     | 5   | 11445.81857     |
| 195      | 208–126 | 1     | 6   | 13353.42283     |
| 196      | 208–126 | 1     | 7   | 15261.01381     |
| 197      | 208–126 | 1     | 8   | 17168.58828     |
| 198      | 208–126 | 1     | 9   | 19076.14345     |
| 199      | 208–126 | 1     | 10  | 20983.68094     |
| 200      | 208–126 | 1     | 11  | 22891.19418     |
| 201      | 208–126 | 1     | 37  | 72471.99400     |

*continued on the next page*

TABLE SII: *continued*

| Line no. | (A–B)   | $\nu$ | $J$ | Frequency (MHz) |
|----------|---------|-------|-----|-----------------|
| 202      | 208–126 | 1     | 55  | 106768.59600    |
| 203      | 208–126 | 1     | 57  | 110577.26900    |
| 204      | 208–126 | 2     | 4   | 9517.31932      |
| 205      | 208–126 | 2     | 5   | 11420.75977     |
| 206      | 208–126 | 2     | 6   | 13324.18967     |
| 207      | 208–126 | 2     | 7   | 15227.60380     |
| 208      | 208–126 | 2     | 8   | 17131.00148     |
| 209      | 208–126 | 2     | 37  | 72313.23800     |
| 210      | 208–126 | 2     | 55  | 106534.61400    |
| 211      | 208–126 | 2     | 57  | 110334.92800    |
| 212      | 208–126 | 3     | 5   | 11395.65623     |
| 213      | 208–126 | 3     | 6   | 13294.90117     |
| 214      | 208–126 | 3     | 7   | 15194.13096     |
| 215      | 208–126 | 3     | 8   | 17093.34644     |
| 216      | 208–126 | 3     | 37  | 72154.23800     |
| 217      | 208–126 | 3     | 55  | 106300.18700    |
| 218      | 208–126 | 3     | 57  | 110092.10800    |
| 219      | 208–126 | 4     | 55  | 106065.32800    |
| 220      | 208–126 | 4     | 57  | 109848.86100    |
| 221      | 208–126 | 5     | 57  | 109605.13600    |
| 222      | 208–124 | 0     | 1   | 3862.06488      |
| 223      | 208–124 | 0     | 2   | 5793.09294      |
| 224      | 208–124 | 0     | 3   | 7724.11363      |
| 225      | 208–124 | 0     | 4   | 9655.12684      |
| 226      | 208–124 | 0     | 5   | 11586.12930     |
| 227      | 208–124 | 0     | 6   | 13517.11959     |
| 228      | 208–124 | 0     | 7   | 15448.09515     |
| 229      | 208–124 | 0     | 8   | 17379.05378     |
| 230      | 208–124 | 0     | 9   | 19309.99406     |
| 231      | 208–124 | 0     | 11  | 23171.81058     |
| 232      | 208–124 | 0     | 12  | 25102.68218     |
| 233      | 208–124 | 0     | 36  | 71430.73900     |
| 234      | 208–124 | 0     | 46  | 90722.63000     |
| 235      | 208–124 | 0     | 51  | 100365.09300    |

*continued on the next page*

TABLE SII: *continued*

| Line no. | (A–B)   | $\nu$ | $J$ | Frequency (MHz) |
|----------|---------|-------|-----|-----------------|
| 236      | 208–124 | 0     | 55  | 108077.09700    |
| 237      | 208–124 | 1     | 55  | 107839.99400    |
| 238      | 208–124 | 2     | 55  | 107602.46800    |
| 239      | 208–124 | 3     | 55  | 107364.49800    |
| 240      | 208–124 | 4     | 55  | 107126.08300    |
| 241      | 208–122 | 0     | 1   | 3901.74608      |
| 242      | 208–122 | 0     | 2   | 5852.61263      |
| 243      | 208–122 | 0     | 3   | 7803.47433      |
| 244      | 208–122 | 0     | 4   | 9754.32697      |
| 245      | 208–122 | 0     | 5   | 11705.16854     |
| 246      | 208–122 | 0     | 6   | 13655.99859     |
| 247      | 208–122 | 0     | 7   | 15606.81197     |
| 248      | 208–122 | 0     | 8   | 17557.61040     |
| 249      | 208–122 | 0     | 9   | 19508.38856     |
| 250      | 208–122 | 0     | 35  | 70214.98100     |
| 251      | 208–122 | 0     | 45  | 89705.81500     |
| 252      | 208–122 | 0     | 46  | 91654.38900     |
| 253      | 208–122 | 0     | 54  | 107239.30300    |
| 254      | 208–122 | 1     | 54  | 107002.83400    |
| 255      | 208–122 | 3     | 54  | 106528.56500    |
| 256      | 206–130 | 0     | 1   | 3764.28758      |
| 257      | 206–130 | 0     | 2   | 5646.42698      |
| 258      | 206–130 | 0     | 3   | 7528.55915      |
| 259      | 206–130 | 0     | 4   | 9410.68419      |
| 260      | 206–130 | 0     | 5   | 11292.79920     |
| 261      | 206–130 | 0     | 6   | 13174.90304     |
| 262      | 206–130 | 0     | 7   | 15056.99283     |
| 263      | 206–130 | 0     | 8   | 16939.06640     |
| 264      | 206–130 | 0     | 9   | 18821.12213     |
| 265      | 206–130 | 0     | 10  | 20703.15837     |
| 266      | 206–130 | 0     | 11  | 22585.17242     |
| 267      | 206–130 | 0     | 12  | 24467.16301     |
| 268      | 206–130 | 0     | 13  | 26349.12912     |
| 269      | 206–130 | 0     | 46  | 88426.68200     |

*continued on the next page*



TABLE SII: *continued*

| Line no. | (A–B)   | $v$ | $J$ | Frequency (MHz) |
|----------|---------|-----|-----|-----------------|
| 270      | 206–130 | 0   | 47  | 90306.59600     |
| 271      | 206–130 | 0   | 53  | 101584.06200    |
| 272      | 206–130 | 0   | 57  | 109100.25500    |
| 273      | 206–130 | 1   | 3   | 7512.27216      |
| 274      | 206–130 | 1   | 4   | 9390.32524      |
| 275      | 206–130 | 1   | 5   | 11268.36925     |
| 276      | 206–130 | 1   | 6   | 13146.39879     |
| 277      | 206–130 | 1   | 7   | 15024.41684     |
| 278      | 206–130 | 1   | 8   | 16902.41810     |
| 279      | 206–130 | 1   | 9   | 18780.40176     |
| 280      | 206–130 | 1   | 10  | 20658.36641     |
| 281      | 206–130 | 1   | 11  | 22536.30977     |
| 282      | 206–130 | 1   | 57  | 108863.94400    |
| 283      | 206–130 | 2   | 5   | 11243.89233     |
| 284      | 206–130 | 2   | 6   | 13117.84482     |
| 285      | 206–130 | 2   | 7   | 14991.78421     |
| 286      | 206–130 | 2   | 57  | 108627.22200    |
| 287      | 206–130 | 3   | 6   | 13089.23856     |
| 288      | 206–130 | 3   | 7   | 14959.09043     |
| 289      | 206–130 | 3   | 57  | 108390.06300    |
| 290      | 206–130 | 4   | 57  | 108152.47400    |
| 291      | 206–130 | 5   | 57  | 107914.42900    |
| 292      | 206–128 | 0   | 1   | 3800.39508      |
| 293      | 206–128 | 0   | 2   | 5700.58798      |
| 294      | 206–128 | 0   | 3   | 7600.77338      |
| 295      | 206–128 | 0   | 4   | 9500.95175      |
| 296      | 206–128 | 0   | 5   | 11401.11998     |
| 297      | 206–128 | 0   | 6   | 13301.27604     |
| 298      | 206–128 | 0   | 7   | 15201.41826     |
| 299      | 206–128 | 0   | 8   | 17101.54459     |
| 300      | 206–128 | 0   | 9   | 19001.65142     |
| 301      | 206–128 | 0   | 10  | 20901.73970     |
| 302      | 206–128 | 0   | 11  | 22801.80544     |
| 303      | 206–128 | 0   | 12  | 24701.84778     |

*continued on the next page*

TABLE SII: *continued*

| Line no. | (A–B)   | $v$ | $J$ | Frequency (MHz) |
|----------|---------|-----|-----|-----------------|
| 304      | 206–128 | 0   | 37  | 72189.16300     |
| 305      | 206–128 | 0   | 46  | 89274.54400     |
| 306      | 206–128 | 0   | 47  | 91172.46100     |
| 307      | 206–128 | 0   | 53  | 102557.93600    |
| 308      | 206–128 | 0   | 55  | 106352.26300    |
| 309      | 206–128 | 1   | 3   | 7584.25150      |
| 310      | 206–128 | 1   | 4   | 9480.29816      |
| 311      | 206–128 | 1   | 5   | 11376.33658     |
| 312      | 206–128 | 1   | 6   | 13272.36131     |
| 313      | 206–128 | 1   | 7   | 15168.37303     |
| 314      | 206–128 | 1   | 8   | 17064.36805     |
| 315      | 206–128 | 1   | 9   | 18960.34511     |
| 316      | 206–128 | 1   | 10  | 20856.30149     |
| 317      | 206–128 | 1   | 11  | 22752.23657     |
| 318      | 206–128 | 1   | 37  | 72032.15600     |
| 319      | 206–128 | 1   | 55  | 106120.81100    |
| 320      | 206–128 | 2   | 5   | 11351.50777     |
| 321      | 206–128 | 2   | 37  | 71874.87400     |
| 322      | 206–128 | 2   | 55  | 105888.97000    |
| 323      | 206–128 | 3   | 5   | 11326.63249     |
| 324      | 206–128 | 3   | 6   | 13214.37120     |
| 325      | 206–128 | 3   | 37  | 71717.30200     |
| 326      | 206–128 | 3   | 55  | 105656.68500    |
| 327      | 206–128 | 4   | 55  | 105423.97400    |
| 328      | 206–126 | 0   | 1   | 3837.63803      |
| 329      | 206–126 | 0   | 2   | 5756.45210      |
| 330      | 206–126 | 0   | 3   | 7675.26064      |
| 331      | 206–126 | 0   | 4   | 9594.06054      |
| 332      | 206–126 | 0   | 5   | 11512.84957     |
| 333      | 206–126 | 0   | 6   | 13431.62738     |
| 334      | 206–126 | 0   | 7   | 15350.39047     |
| 335      | 206–126 | 0   | 8   | 17269.13637     |
| 336      | 206–126 | 0   | 9   | 19187.86461     |
| 337      | 206–126 | 0   | 10  | 21106.57184     |

*continued on the next page*

TABLE SII: *continued*

| Line no. | (A-B)   | $v$ | $J$ | Frequency (MHz) |
|----------|---------|-----|-----|-----------------|
| 338      | 206-126 | 0   | 11  | 23025.25733     |
| 339      | 206-126 | 0   | 12  | 24943.91625     |
| 340      | 206-126 | 0   | 46  | 90149.08500     |
| 341      | 206-126 | 0   | 55  | 107393.92000    |
| 342      | 206-126 | 1   | 5   | 11487.70052     |
| 343      | 206-126 | 1   | 6   | 13402.28585     |
| 344      | 206-126 | 1   | 7   | 15316.85648     |
| 345      | 206-126 | 1   | 8   | 17231.41135     |
| 346      | 206-126 | 1   | 9   | 19145.94729     |
| 347      | 206-126 | 1   | 10  | 21060.46383     |
| 348      | 206-126 | 1   | 55  | 107159.08100    |
| 349      | 206-126 | 2   | 6   | 13372.88847     |
| 350      | 206-126 | 2   | 55  | 106923.79100    |
| 351      | 206-126 | 3   | 6   | 13343.44200     |
| 352      | 206-126 | 3   | 55  | 106688.07700    |
| 353      | 206-126 | 4   | 55  | 106451.91800    |
| 354      | 206-124 | 0   | 1   | 3876.07165      |
| 355      | 206-124 | 0   | 2   | 5814.10284      |
| 356      | 206-124 | 0   | 3   | 7752.12653      |
| 357      | 206-124 | 0   | 4   | 9690.14247      |
| 358      | 206-124 | 0   | 5   | 11628.14884     |
| 359      | 206-124 | 0   | 6   | 13566.14234     |
| 360      | 206-124 | 0   | 7   | 15504.12085     |
| 361      | 206-124 | 0   | 8   | 17442.08186     |
| 362      | 206-124 | 0   | 9   | 19380.02553     |
| 363      | 206-122 | 0   | 1   | 3915.75217      |
| 364      | 206-122 | 0   | 2   | 5873.62271      |
| 365      | 206-122 | 0   | 3   | 7831.48708      |
| 366      | 206-122 | 0   | 4   | 9789.34277      |
| 367      | 206-122 | 0   | 5   | 11747.18803     |
| 368      | 206-122 | 0   | 6   | 13705.02040     |
| 369      | 206-122 | 0   | 7   | 15662.83767     |
| 370      | 206-122 | 0   | 8   | 17620.63824     |
| 371      | 206-122 | 0   | 9   | 19578.41929     |

*continued on the next page*

TABLE SII: *continued*

| Line no. | (A–B)   | $\nu$ | $J$ | Frequency (MHz) |
|----------|---------|-------|-----|-----------------|
| 372      | 204–130 | 0     | 1   | 3778.56411      |
| 373      | 204–130 | 0     | 2   | 5667.84076      |
| 374      | 204–130 | 0     | 3   | 7557.11177      |
| 375      | 204–130 | 0     | 4   | 9446.37508      |
| 376      | 204–130 | 0     | 5   | 11335.62867     |
| 377      | 204–130 | 0     | 6   | 13224.87048     |
| 378      | 204–130 | 0     | 7   | 15114.09468     |
| 379      | 204–130 | 0     | 8   | 17003.30936     |
| 380      | 204–130 | 0     | 9   | 18892.50250     |
| 381      | 204–128 | 0     | 1   | 3814.67101      |
| 382      | 204–128 | 0     | 2   | 5722.00221      |
| 383      | 204–128 | 0     | 3   | 7629.32648      |
| 384      | 204–128 | 0     | 4   | 9536.64230      |
| 385      | 204–128 | 0     | 5   | 11443.94901     |
| 386      | 204–128 | 0     | 6   | 13351.24309     |
| 387      | 204–128 | 0     | 7   | 15258.52244     |
| 388      | 204–128 | 0     | 8   | 17165.78692     |
| 389      | 204–128 | 0     | 9   | 19073.03193     |
| 390      | 204–126 | 0     | 2   | 5777.86723      |
| 391      | 204–126 | 0     | 3   | 7703.81252      |
| 392      | 204–126 | 0     | 4   | 9629.75040      |
| 393      | 204–126 | 0     | 5   | 11555.67822     |
| 394      | 204–126 | 0     | 6   | 13481.59388     |
| 395      | 204–126 | 0     | 7   | 15407.49372     |
| 396      | 204–126 | 0     | 8   | 17333.37862     |
| 397      | 204–126 | 0     | 9   | 19259.24450     |
| 398      | 204–124 | 0     | 4   | 9725.83322      |
| 399      | 204–124 | 0     | 5   | 11670.97751     |
| 400      | 204–125 | 0     | 4   | 9677.34120      |
| 401      | 204–125 | 0     | 5   | 11612.78740     |
| 402      | 204–125 | 0     | 6   | 13548.22160     |
| 403      | 206–123 | 0     | 2   | 5843.58030      |
| 404      | 206–123 | 0     | 3   | 7791.43080      |
| 405      | 206–123 | 0     | 4   | 9739.27290      |

*continued on the next page*

TABLE SII: *continued*

| Line no. | (A–B)   | $v$ | $J$ | Frequency (MHz) |
|----------|---------|-----|-----|-----------------|
| 406      | 206–123 | 0   | 5   | 11687.10470     |
| 407      | 206–123 | 0   | 6   | 13634.92400     |
| 408      | 206–125 | 0   | 1   | 3856.67470      |
| 409      | 206–125 | 0   | 2   | 5785.00700      |
| 410      | 206–125 | 0   | 3   | 7713.33300      |
| 411      | 206–125 | 0   | 4   | 9641.65080      |
| 412      | 206–125 | 0   | 5   | 11569.95830     |
| 413      | 206–125 | 0   | 6   | 13498.25340     |
| 414      | 206–125 | 0   | 7   | 15426.53410     |
| 415      | 206–125 | 0   | 8   | 17354.79830     |
| 416      | 206–125 | 0   | 9   | 19283.04390     |
| 417      | 206–125 | 0   | 10  | 21211.26890     |
| 418      | 206–125 | 0   | 11  | 23139.47130     |
| 419      | 207–122 | 0   | 2   | 5863.06350      |
| 420      | 207–122 | 0   | 3   | 7817.40800      |
| 421      | 207–122 | 0   | 4   | 9771.74410      |
| 422      | 207–122 | 0   | 5   | 11726.06950     |
| 423      | 207–122 | 0   | 6   | 13680.38220     |
| 424      | 207–122 | 0   | 7   | 15634.68000     |
| 425      | 207–122 | 0   | 8   | 17588.96080     |
| 426      | 207–122 | 0   | 9   | 19543.22240     |
| 427      | 207–124 | 0   | 2   | 5803.54330      |
| 428      | 207–124 | 0   | 3   | 7738.04800      |
| 429      | 207–124 | 0   | 4   | 9672.54430      |
| 430      | 207–124 | 0   | 5   | 11607.03020     |
| 431      | 207–124 | 0   | 6   | 13541.50360     |
| 432      | 207–124 | 0   | 7   | 15475.96250     |
| 433      | 207–124 | 0   | 8   | 17410.40460     |
| 434      | 207–124 | 0   | 9   | 19344.82790     |
| 435      | 207–126 | 0   | 1   | 3830.59870      |
| 436      | 207–126 | 0   | 2   | 5745.89300      |
| 437      | 207–126 | 0   | 3   | 7661.18110      |
| 438      | 207–126 | 0   | 4   | 9576.46100      |
| 439      | 207–126 | 0   | 5   | 11491.73070     |

*continued on the next page*

TABLE SII: *continued*

| Line no. | (A–B)   | $v$ | $J$ | Frequency (MHz) |
|----------|---------|-----|-----|-----------------|
| 440      | 207–126 | 0   | 6   | 13406.98820     |
| 441      | 207–126 | 0   | 7   | 15322.23130     |
| 442      | 207–126 | 0   | 8   | 17237.45810     |
| 443      | 207–126 | 0   | 9   | 19152.66640     |
| 444      | 207–126 | 0   | 10  | 21067.85440     |
| 445      | 207–126 | 0   | 11  | 22983.01980     |
| 446      | 207–126 | 0   | 12  | 24898.16070     |
| 447      | 207–126 | 1   | 5   | 11466.65000     |
| 448      | 207–126 | 1   | 6   | 13377.72730     |
| 449      | 207–126 | 1   | 7   | 15288.79030     |
| 450      | 207–126 | 1   | 9   | 19110.86520     |
| 451      | 207–128 | 0   | 1   | 3793.35490      |
| 452      | 207–128 | 0   | 2   | 5690.02740      |
| 453      | 207–128 | 0   | 3   | 7586.69380      |
| 454      | 207–128 | 0   | 4   | 9483.35230      |
| 455      | 207–128 | 0   | 5   | 11380.00070     |
| 456      | 207–128 | 0   | 6   | 13276.63710     |
| 457      | 207–128 | 0   | 7   | 15173.25950     |
| 458      | 207–128 | 0   | 8   | 17069.86580     |
| 459      | 207–128 | 0   | 9   | 18966.45410     |
| 460      | 207–128 | 0   | 10  | 20863.02240     |
| 461      | 207–128 | 0   | 11  | 22759.56870     |
| 462      | 207–128 | 0   | 12  | 24656.09090     |
| 463      | 207–128 | 0   | 37  | 72055.47100     |
| 464      | 207–128 | 0   | 47  | 91003.65400     |
| 465      | 207–128 | 0   | 55  | 106155.36900    |
| 466      | 207–128 | 1   | 5   | 11355.28680     |
| 467      | 207–128 | 1   | 6   | 13247.80390     |
| 468      | 207–128 | 1   | 7   | 15140.30670     |
| 469      | 207–128 | 1   | 8   | 17032.79340     |
| 470      | 207–128 | 1   | 9   | 18925.26170     |
| 471      | 207–128 | 1   | 10  | 20817.70980     |
| 472      | 207–128 | 1   | 37  | 71898.90800     |
| 473      | 207–128 | 1   | 55  | 105924.57400    |

*continued on the next page*

TABLE SII: *continued*

| Line no. | (A–B)   | $v$ | $J$ | Frequency (MHz) |
|----------|---------|-----|-----|-----------------|
| 474      | 207–128 | 2   | 37  | 71742.06400     |
| 475      | 207–128 | 3   | 37  | 71584.92400     |
| 476      | 207–130 | 0   | 1   | 3757.24760      |
| 477      | 207–130 | 0   | 2   | 5635.86640      |
| 478      | 207–130 | 0   | 3   | 7514.47940      |
| 479      | 207–130 | 0   | 4   | 9393.08460      |
| 480      | 207–130 | 0   | 5   | 11271.67990     |
| 481      | 207–130 | 0   | 6   | 13150.26340     |
| 482      | 207–130 | 0   | 7   | 15028.83320     |
| 483      | 207–130 | 0   | 8   | 16907.38730     |
| 484      | 207–130 | 0   | 9   | 18785.92360     |
| 485      | 207–130 | 0   | 10  | 20664.44040     |
| 486      | 207–130 | 0   | 11  | 22542.93560     |
| 487      | 207–130 | 0   | 12  | 24421.40720     |
| 488      | 207–130 | 0   | 13  | 26299.85320     |
| 489      | 207–130 | 0   | 56  | 107020.94200    |
| 490      | 207–130 | 0   | 57  | 108896.32300    |
| 491      | 207–130 | 1   | 5   | 11247.31770     |
| 492      | 207–130 | 1   | 6   | 13121.84060     |
| 493      | 207–130 | 1   | 7   | 14996.34960     |
| 494      | 207–130 | 1   | 8   | 16870.84270     |
| 495      | 207–130 | 1   | 9   | 18745.31790     |
| 496      | 207–130 | 1   | 56  | 106789.38500    |
| 497      | 207–130 | 1   | 57  | 108660.69500    |
| 498      | 207–130 | 2   | 56  | 106557.40400    |
| 499      | 207–130 | 2   | 57  | 108424.62100    |
| 500      | 207–130 | 3   | 56  | 106324.97100    |
| 501      | 207–130 | 3   | 57  | 108188.14500    |
| 502      | 207–130 | 4   | 56  | 106092.16000    |
| 503      | 207–130 | 4   | 57  | 107951.21600    |
| 504      | 207–130 | 5   | 57  | 107713.84700    |
| 505      | 207–130 | 6   | 57  | 107476.02800    |
| 506      | 208–123 | 0   | 2   | 5822.57080      |
| 507      | 208–123 | 0   | 3   | 7763.41800      |

*continued on the next page*

TABLE SII: *continued*

| Line no. | (A-B)   | $v$ | $J$ | Frequency (MHz) |
|----------|---------|-----|-----|-----------------|
| 508      | 208-123 | 0   | 4   | 9704.25690      |
| 509      | 208-123 | 0   | 5   | 11645.08530     |
| 510      | 208-123 | 0   | 6   | 13585.90120     |
| 511      | 208-123 | 0   | 7   | 15526.70250     |
| 512      | 208-123 | 0   | 9   | 19408.25290     |
| 513      | 208-125 | 0   | 1   | 3842.66800      |
| 514      | 208-125 | 0   | 2   | 5763.99690      |
| 515      | 208-125 | 0   | 3   | 7685.31970      |
| 516      | 208-125 | 0   | 4   | 9606.63430      |
| 517      | 208-125 | 0   | 5   | 11527.93880     |
| 518      | 208-125 | 0   | 6   | 13449.23090     |
| 519      | 208-125 | 0   | 7   | 15370.50880     |
| 520      | 208-125 | 0   | 8   | 17291.77030     |
| 521      | 208-125 | 0   | 9   | 19213.01350     |
| 522      | 208-125 | 0   | 10  | 21134.23620     |
| 523      | 208-125 | 0   | 11  | 23055.43650     |
| 524      | 207-123 | 0   | 4   | 9721.67360      |
| 525      | 207-123 | 0   | 5   | 11665.98530     |
| 526      | 207-123 | 0   | 9   | 19443.08610     |
| 527      | 207-125 | 0   | 2   | 5774.44770      |
| 528      | 207-125 | 0   | 3   | 7699.25410      |
| 529      | 207-125 | 0   | 4   | 9624.05220      |
| 530      | 207-125 | 0   | 5   | 11548.84010     |
| 531      | 207-125 | 0   | 6   | 13473.61570     |
| 532      | 207-125 | 0   | 7   | 15398.37690     |
| 533      | 207-125 | 0   | 9   | 19247.84810     |



TABLE SIII: Dunham constants, spectroscopic parameters, mass-independent  $U_{lm}$  constants, and BOB-correction terms for 16 isotopologues of PbSe obtained using method A (see text)<sup>a</sup>.

| Isotopologue                    | $x^b / \%$ | $Y_{01} / \text{MHz}$<br>$B_e$ | $Y_{11} / \text{MHz}$<br>$-\alpha_e$                | $Y_{21} / \text{kHz}$<br>$\gamma_e$                 | $Y_{31} / \text{Hz}$<br>$\epsilon_e$ | $Y_{02} / \text{kHz}$<br>$-D_e$ | $Y_{12} / \text{Hz}$<br>$-\beta_e$   |
|---------------------------------|------------|--------------------------------|-----------------------------------------------------|-----------------------------------------------------|--------------------------------------|---------------------------------|--------------------------------------|
| $^{208}\text{Pb}^{80}\text{Se}$ | 26.00      | 1516.936172(10)                | -3.8936033(99)                                      | -3.4051(23)                                         | -21.11(14)                           | -0.200430(20)                   | -0.4214(48)                          |
| $^{208}\text{Pb}^{78}\text{Se}$ | 12.46      | 1545.053073(11)                | -4.002359(10)                                       | -3.5325(24)                                         | -22.10(14)                           | -0.207929(21)                   | -0.4412(51)                          |
| $^{206}\text{Pb}^{80}\text{Se}$ | 11.96      | 1521.028876(12)                | -3.909373(10)                                       | -3.4235(23)                                         | -21.25(14)                           | -0.201513(20)                   | -0.4243(49)                          |
| $^{207}\text{Pb}^{80}\text{Se}$ | 10.96      | 1518.971937(10)                | -3.9014449(99)                                      | -3.4143(23)                                         | -21.18(14)                           | -0.200969(20)                   | -0.4229(48)                          |
| $^{206}\text{Pb}^{78}\text{Se}$ | 5.73       | 1549.145766(12)                | -4.018274(10)                                       | -3.5512(24)                                         | -22.25(14)                           | -0.209032(21)                   | -0.4442(51)                          |
| $^{207}\text{Pb}^{78}\text{Se}$ | 5.25       | 1547.088832(10)                | -4.010273(10)                                       | -3.5418(24)                                         | -22.18(14)                           | -0.208478(21)                   | -0.4427(51)                          |
| $^{208}\text{Pb}^{76}\text{Se}$ | 4.91       | 1574.633831(13)                | -4.117850(10)                                       | -3.6691(25)                                         | -23.18(15)                           | -0.215967(22)                   | -0.4627(53)                          |
| $^{208}\text{Pb}^{77}\text{Se}$ | 4.57       | 1490.179075(12)                | -3.7910388(97)                                      | -3.2860(23)                                         | -20.19(13)                           | -0.193422(19)                   | -0.4031(46)                          |
| $^{208}\text{Pb}^{77}\text{Se}$ | 4.00       | 1559.626887(11)                | -4.059122(10)                                       | -3.5995(25)                                         | -22.63(14)                           | -0.211870(21)                   | -0.4517(52)                          |
| $^{206}\text{Pb}^{76}\text{Se}$ | 2.26       | 1578.726513(14)                | -4.133917(11)                                       | -3.6882(25)                                         | -23.33(15)                           | -0.217092(22)                   | -0.4657(54)                          |
| $^{206}\text{Pb}^{82}\text{Se}$ | 2.10       | 1494.271789(13)                | -3.8066693(97)                                      | -3.3041(23)                                         | -20.33(13)                           | -0.194486(19)                   | -0.4059(47)                          |
| $^{207}\text{Pb}^{76}\text{Se}$ | 2.07       | 1576.669585(13)                | -4.125840(11)                                       | -3.6786(25)                                         | -23.25(15)                           | -0.216526(22)                   | -0.4642(53)                          |
| $^{207}\text{Pb}^{82}\text{Se}$ | 1.93       | 1492.214845(12)                | -3.7988109(97)                                      | -3.2950(23)                                         | -20.26(13)                           | -0.193951(19)                   | -0.4045(46)                          |
| $^{206}\text{Pb}^{77}\text{Se}$ | 1.84       | 1563.719574(13)                | -4.075112(10)                                       | -3.6184(25)                                         | -22.78(15)                           | -0.212984(21)                   | -0.4547(52)                          |
| $^{207}\text{Pb}^{77}\text{Se}$ | 1.69       | 1561.662643(11)                | -4.067073(10)                                       | -3.6089(25)                                         | -22.70(15)                           | -0.212424(21)                   | -0.4532(52)                          |
| $^{204}\text{Pb}^{80}\text{Se}$ | 0.69       | 1525.200313(19)                | -3.925469(10)                                       | -3.4423(24)                                         | -21.40(14)                           | -0.202620(20)                   | -0.4272(49)                          |
|                                 |            | $U_{01} / \mu\text{MHz}$       | $U_{11} / \text{u}^3 / ^2\text{MHz}$                | $U_{21} / \text{u}^2\text{MHz}$                     | $U_{31} / \text{u}^5 / ^2\text{MHz}$ | $U_{02} / \text{u}^2\text{MHz}$ | $U_{12} / \text{u}^5 / ^2\text{MHz}$ |
| PbSe                            |            | 87580.535(56)                  | -1707.9744(43)                                      | -11.3493(77)                                        | -0.5346(35)                          | -0.668040(67)                   | -0.01067(12)                         |
|                                 |            |                                | $\delta_{01}^{\text{Pb}} = 51.71(96)^c \text{ kHz}$ |                                                     |                                      |                                 |                                      |
|                                 |            |                                | $\Delta_{01}^{\text{Pb}} = -12.92(24)$              |                                                     |                                      |                                 |                                      |
|                                 |            |                                |                                                     | $\delta_{01}^{\text{Se}} = 19.94(17)^c \text{ kHz}$ |                                      |                                 |                                      |
|                                 |            |                                |                                                     | $\Delta_{01}^{\text{Se}} = -1.915(16)$              |                                      |                                 |                                      |

<sup>a</sup>Numbers in parentheses give one standard deviation in units of the last quoted digit.

<sup>b</sup>Natural abundance (%) of the isotopologue.

<sup>c</sup>Adopting  $^{208}\text{Pb}^{80}\text{Se}$  as the reference isotopologue.

TABLE SIV: Dunham constants, spectroscopic parameters, mass-independent  $U_{lm}$  constants, and BOB-correction terms for 26 isotopologues of PbTe obtained using method A (see text)<sup>a</sup>.

| Isotopologue                        | $x^b / \%$ | $Y_0 / \text{MHz}$<br>$B_e$                         | $Y_{11} / \text{MHz}$<br>$-\alpha_e$               | $Y_{21} / \text{kHz}$<br>$\gamma_e$    | $Y_{31} / \text{Hz}$<br>$\epsilon_e$ | $Y_{02} / \text{kHz}$<br>$-D_e$    | $Y_{12} / \text{Hz}$<br>$-\beta_e$ |
|-------------------------------------|------------|-----------------------------------------------------|----------------------------------------------------|----------------------------------------|--------------------------------------|------------------------------------|------------------------------------|
| <sup>208</sup> Pb <sup>130</sup> Te | 17.86      | 938.5816677(65)                                     | -2.0209726(66)                                     | -1.7838(18)                            | -8.79(11)                            | -0.0815125(52)                     | -0.1687(12)                        |
| <sup>208</sup> Pb <sup>128</sup> Te | 16.63      | 947.6231916(63)                                     | -2.0502458(67)                                     | -1.8184(19)                            | -9.01(12)                            | -0.0830905(53)                     | -0.1728(12)                        |
| <sup>208</sup> Pb <sup>126</sup> Te | 9.87       | 956.9493571(65)                                     | -2.0805872(68)                                     | -1.8543(19)                            | -9.23(12)                            | -0.0847341(54)                     | -0.1771(12)                        |
| <sup>206</sup> Pb <sup>130</sup> Te | 8.21       | 942.0891264(67)                                     | -2.0323126(66)                                     | -1.7972(18)                            | -8.88(11)                            | -0.0821229(52)                     | -0.1703(12)                        |
| <sup>206</sup> Pb <sup>128</sup> Te | 7.65       | 951.1306471(66)                                     | -2.0616401(67)                                     | -1.8318(19)                            | -9.09(12)                            | -0.0837068(53)                     | -0.1744(12)                        |
| <sup>207</sup> Pb <sup>130</sup> Te | 7.53       | 940.3263237(64)                                     | -2.0266106(66)                                     | -1.7905(18)                            | -8.84(11)                            | -0.0818158(52)                     | -0.1695(12)                        |
| <sup>207</sup> Pb <sup>128</sup> Te | 7.01       | 949.3678460(62)                                     | -2.0559108(67)                                     | -1.8251(19)                            | -9.05(12)                            | -0.0833968(53)                     | -0.1736(12)                        |
| <sup>206</sup> Pb <sup>126</sup> Te | 4.54       | 960.4568094(68)                                     | -2.0920374(68)                                     | -1.8679(19)                            | -9.32(12)                            | -0.0853564(54)                     | -0.1787(13)                        |
| <sup>207</sup> Pb <sup>126</sup> Te | 4.16       | 958.6940099(64)                                     | -2.0862800(68)                                     | -1.8611(19)                            | -9.27(12)                            | -0.0850434(54)                     | -0.1779(12)                        |
| <sup>208</sup> Pb <sup>125</sup> Te | 3.70       | 961.7163389(68)                                     | -2.0961532(68)                                     | -1.8729(19)                            | -9.35(12)                            | -0.0855804(54)                     | -0.1793(13)                        |
| <sup>208</sup> Pb <sup>124</sup> Te | 2.48       | 966.5734981(72)                                     | -2.1120534(69)                                     | -1.8918(19)                            | -9.47(12)                            | -0.0864470(55)                     | -0.1815(13)                        |
| <sup>206</sup> Pb <sup>120</sup> Te | 1.70       | 965.2237900(72)                                     | -2.1076318(69)                                     | -1.8865(19)                            | -9.43(12)                            | -0.0862058(55)                     | -0.1809(13)                        |
| <sup>207</sup> Pb <sup>125</sup> Te | 1.56       | 963.4609910(67)                                     | -2.1018602(69)                                     | -1.8797(19)                            | -9.39(12)                            | -0.0858912(54)                     | -0.1801(13)                        |
| <sup>208</sup> Pb <sup>122</sup> Te | 1.34       | 976.5098600(84)                                     | -2.1447052(70)                                     | -1.9309(20)                            | -9.71(13)                            | -0.0882336(56)                     | -0.1862(13)                        |
| <sup>206</sup> Pb <sup>124</sup> Te | 1.14       | 970.0809470(76)                                     | -2.1233569(69)                                     | -1.9056(20)                            | -9.55(12)                            | -0.0870756(55)                     | -0.1832(13)                        |
| <sup>207</sup> Pb <sup>124</sup> Te | 1.05       | 968.3181490(72)                                     | -2.1177748(69)                                     | -1.8987(19)                            | -9.51(12)                            | -0.0867594(55)                     | -0.1824(13)                        |
| <sup>206</sup> Pb <sup>122</sup> Te | 0.61       | 980.0173050(87)                                     | -2.1562716(70)                                     | -1.9448(20)                            | -9.80(13)                            | -0.0888686(56)                     | -0.1879(13)                        |
| <sup>207</sup> Pb <sup>122</sup> Te | 0.56       | 978.2545090(83)                                     | -2.1504559(70)                                     | -1.9378(20)                            | -9.75(13)                            | -0.0885491(56)                     | -0.1871(13)                        |
| <sup>204</sup> Pb <sup>130</sup> Te | 0.48       | 945.6640590(87)                                     | -2.0438924(67)                                     | -1.8109(19)                            | -8.96(12)                            | -0.0827474(52)                     | -0.1719(12)                        |
| <sup>208</sup> Pb <sup>123</sup> Te | 0.47       | 971.4946340(78)                                     | -2.1282038(69)                                     | -1.9111(20)                            | -9.59(12)                            | -0.0873296(55)                     | -0.1839(13)                        |
| <sup>204</sup> Pb <sup>128</sup> Te | 0.44       | 954.7055770(86)                                     | -2.0732753(68)                                     | -1.8456(19)                            | -9.18(12)                            | -0.0843373(53)                     | -0.1760(12)                        |
| <sup>204</sup> Pb <sup>126</sup> Te | 0.26       | 964.0317360(89)                                     | -2.1037294(69)                                     | -1.8819(19)                            | -9.40(12)                            | -0.0859931(55)                     | -0.1803(13)                        |
| <sup>206</sup> Pb <sup>123</sup> Te | 0.21       | 975.0020810(81)                                     | -2.1397405(70)                                     | -1.9249(20)                            | -9.67(12)                            | -0.0879613(56)                     | -0.1855(13)                        |
| <sup>207</sup> Pb <sup>123</sup> Te | 0.20       | 973.2392840(77)                                     | -2.1339397(70)                                     | -1.9180(20)                            | -9.63(12)                            | -0.0876435(56)                     | -0.1847(13)                        |
| <sup>204</sup> Pb <sup>125</sup> Te | 0.10       | 968.7987150(92)                                     | -2.1193527(69)                                     | -1.9005(19)                            | -9.52(12)                            | -0.0868456(55)                     | -0.1826(13)                        |
| <sup>204</sup> Pb <sup>124</sup> Te | 0.07       | 973.6558700(96)                                     | -2.1353112(70)                                     | -1.9196(20)                            | -9.64(12)                            | -0.0877186(56)                     | -0.1849(13)                        |
|                                     |            | $U_{01} / \mu\text{MHz}$                            | $U_{11} / \text{u}^3 / \text{MHz}$                 | $U_{21} / \text{u}^2 / \text{MHz}$     | $U_{31} / \text{u}^5 / \text{MHz}$   | $U_{02} / \text{u}^2 / \text{MHz}$ | $U_{12} / \text{u}^5 / \text{MHz}$ |
| PbTe                                |            | 75052.812(31)                                       | -1445.0336(47)                                     | -11.405(12)                            | -0.5026(63)                          | -0.521172(33)                      | -0.009645(69)                      |
|                                     |            | $\delta_{01}^{\text{Pb}} = 28.63(37)^c \text{ kHz}$ | $\delta_{01}^{\text{Te}} = 7.17(11)^c \text{ kHz}$ | $\Delta_{01}^{\text{Te}} = -1.809(28)$ |                                      |                                    |                                    |
|                                     |            | $\Delta_{01}^{\text{Pb}} = -11.56(15)$              |                                                    |                                        |                                      |                                    |                                    |

<sup>a</sup>Numbers in parentheses give one standard deviation in units of the last quoted digit.

<sup>b</sup>Natural abundance (%) of the isotopologue.

<sup>c</sup>Adopting <sup>208</sup>Pb<sup>130</sup>Te as the reference isotopologue.
